# Supplementary material
Source: PubMed Central journal article supplement (PMC7186153)
Supplement: NIHMS1545258-supplement-1.pdf [file NIHMS1545258-supplement-1.pdf]

**Supplementary Table I (online only).** County-level models using rate per 1000 of amputation as outcome

| Variable                                              | Estimated coefficient (95% credible interval) |
|-------------------------------------------------------|-----------------------------------------------|
| Major amputation county-level model (DIC = 157.41)    |                                               |
| Obesity rate per 1000                                 | 0.0022 (−0.0026 to 0.0068)                    |
| Hypercholesterolemia per 1000                         | −0.0004 (−0.0045 to 0.0037)                   |
| Renal failure rate per 1000                           | 0.0044 (−0.0086 to 0.0174)                    |
| CKD rate per 1000                                     | −0.0016 (−0.0078 to 0.0045)                   |
| COPD rate per 1000                                    | −0.0026 (−0.0076 to 0.0023)                   |
| CHF rate per 1000                                     | −0.0038 (−0.0109 to 0.0033)                   |
| CAD rate per 1000                                     | 0.0011 (−0.0042 to 0.0065)                    |
| Log (diabetes rate per 1000)                          | −3.2715 (−47.9764 to 41.9152)                 |
| PAD rate per 1000                                     | −0.0067 (−0.0753 to 0.0623)                   |
| Diabetes with PAD rate per 1000                       | −0.0036 (−0.0710 to 0.0643)                   |
| Medicaid rate per 1000                                | 0.0008 (−0.0062 to 0.0078)                    |
| Rurality                                              | 0.1463 (−0.4075 to 0.7019)                    |
| Minor amputation county-level model (DIC = 187.47)    |                                               |
| Obesity rate per 1000                                 | 0.0017 (−0.0023 to 0.0058)                    |
| Hypercholesterolemia per 1000                         | −0.0012 (−0.0049 to 0.0025)                   |
| Renal failure rate per 1000                           | 0.0025 (−0.0089 to 0.0139)                    |
| CKD rate per 1000                                     | 0.0012 (−0.0042 to 0.0067)                    |
| COPD rate per 1000                                    | −0.0009 (−0.0053 to 0.0035)                   |
| CHF rate per 1000                                     | −0.0040 (−0.0102 to 0.0023)                   |
| CAD rate per 1000                                     | 0.0000 (−0.0047 to 0.0047)                    |
| Log (diabetes rate per 1000)                          | 4.1831 (−38.2288 to 47.0341)                  |
| PAD rate per 1000                                     | 0.0023 (−0.0627 to 0.0678)                    |
| Diabetes with PAD rate per 1000                       | 0.0124 (−0.0509 to 0.0762)                    |
| Medicaid rate per 1000                                | 0.0010 (−0.0051 to 0.0071)                    |
| Rurality                                              | −0.0165 (−0.5042 to 0.4721)                   |
| Major amputation zip code-level model (DIC = 1791.87) |                                               |
| Obesity rate per 1000                                 | 0.0005 (−0.0020 to 0.0029)                    |
| Hypercholesterolemia per 1000                         | −0.0023 (−0.0042 to −0.0004) <sup>a</sup>     |
| Renal failure rate per 1000                           | 0.0017 (−0.0019 to 0.0052)                    |
| CKD rate per 1000                                     | 0.0003 (−0.0021 to 0.0027)                    |
| COPD rate per 1000                                    | −0.0015 (−0.0033 to 0.0004)                   |
| CHF rate per 1000                                     | −0.0010 (−0.0033 to 0.0013)                   |
| CAD rate per 1000                                     | 0.0011 (−0.0010 to 0.0032)                    |
| Log (diabetes rate per 1000)                          | 35.3658 (21.3339-50.0095) <sup>a</sup>        |
| PAD rate per 1000                                     | 0.0546 (0.0329-0.0772) <sup>a</sup>           |
| Diabetes with PAD rate per 1000                       | 0.0601 (0.0386-0.0825) <sup>a</sup>           |
| Medicaid rate per 1000                                | 0.0005 (−0.0016 to 0.0027)                    |
| Rurality                                              | 0.0362 (−0.3202 to 0.3923)                    |
| Minor amputation zip code-level model (DIC = 1884.68) |                                               |
| Obesity rate per 1000                                 | 0.0005 (−0.0020 to 0.0030)                    |
| Hypercholesterolemia per 1000                         | −0.0011 (−0.0028 to 0.0006)                   |
| Renal failure rate per 1000                           | 0.0005 (−0.0028 to 0.0037)                    |
| CKD rate per 1000                                     | 0.0025 (0.0002-0.0047) <sup>a</sup>           |
| COPD rate per 1000                                    | −0.0010 (−0.0025 to 0.0005)                   |
| CHF rate per 1000                                     | −0.0019 (−0.0040 to 0.0001)                   |
| CAD rate per 1000                                     | 0.0002 (−0.0016 to 0.0020)                    |
| Log (diabetes rate per 1000)                          | 27.8627 (15.0319-41.2191) <sup>a</sup>        |

(Continued on next page)

**Supplementary Table I (online only).** Continued.

| Variable                        | Estimated coefficient (95% credible interval) |
|---------------------------------|-----------------------------------------------|
| PAD rate per 1000               | 0.0395 (0.0198-0.0599) <sup>a</sup>           |
| Diabetes with PAD rate per 1000 | 0.0514 (0.0317-0.0720)                        |
| Medicaid rate per 1000          | 0.0004 (-0.0016 to 0.0023)                    |
| Rurality                        | 0.0725 (-0.2231 to 0.3698)                    |

*CAD*, Coronary artery disease; *CHF*, congestive heart failure; *CKD*, chronic kidney disease; *COPD*, chronic obstructive pulmonary disease; *DIC*, deviance information criteria; *PAD*, peripheral arterial disease.  
<sup>a</sup>Statistically significant association.

**Supplementary Table II (online only).** County-level models using relative risk of amputation as outcome

| Variable                                              | Estimated coefficient (95% credible interval) |
|-------------------------------------------------------|-----------------------------------------------|
| Major amputation county-level model (DIC = 145.36)    |                                               |
| Obesity rate per 1000                                 | 0.0022 (-0.0066 to 0.0104)                    |
| Hypercholesterolemia per 1000                         | -0.0004 (-0.0080 to 0.0072)                   |
| Renal failure rate per 1000                           | 0.0047 (-0.0196 to 0.0288)                    |
| CKD rate per 1000                                     | -0.0015 (-0.0130 to 0.0101)                   |
| COPD rate per 1000                                    | -0.0025 (-0.0119 to 0.0066)                   |
| CHF rate per 1000                                     | -0.0040 (-0.0171 to 0.0090)                   |
| CAD rate per 1000                                     | 0.0011 (-0.0087 to 0.0111)                    |
| Log (diabetes rate per 1000)                          | -0.3490 (-55.4056 to 55.3314)                 |
| PAD rate per 1000                                     | -0.0022 (-0.0876 to 0.0838)                   |
| Diabetes with PAD rate per 1000                       | 0.0006 (-0.0852 to 0.0871)                    |
| Medicaid rate per 1000                                | 0.0009 (-0.0123 to 0.0138)                    |
| Rurality                                              | 0.1557 (-0.8694 to 1.2022)                    |
| Minor amputation county-level model (DIC = 143.34)    |                                               |
| Obesity rate per 1000                                 | 0.0017 (-0.0070 to 0.0100)                    |
| Hypercholesterolemia per 1000                         | -0.0011 (-0.0091 to 0.0068)                   |
| Renal failure rate per 1000                           | 0.0029 (-0.0219 to 0.0274)                    |
| CKD rate per 1000                                     | 0.0013 (-0.0106 to 0.0133)                    |
| COPD rate per 1000                                    | -0.0008 (-0.0104 to 0.0086)                   |
| CHF rate per 1000                                     | -0.0047 (-0.0184 to 0.0089)                   |
| CAD rate per 1000                                     | 0.0004 (-0.0096 to 0.0105)                    |
| Log (diabetes rate per 1000)                          | 2.3282 (-53.2750 to 58.5460)                  |
| PAD rate per 1000                                     | -0.0008 (-0.0872 to 0.0862)                   |
| Diabetes with PAD rate per 1000                       | 0.0099 (-0.0766 to 0.0970)                    |
| Medicaid rate per 1000                                | 0.0010 (-0.0124 to 0.0141)                    |
| Rurality                                              | -0.0200 (-1.0701 to 1.0473)                   |
| Major amputation zip code-level model (DIC = 1289.81) |                                               |
| Obesity rate per 1000                                 | 0.0003 (-0.0015 to 0.0018)                    |
| Hypercholesterolemia per 1000                         | -0.0008 (-0.0021 to 0.0006)                   |
| Renal failure rate per 1000                           | 0.0014 (-0.0012 to 0.0039)                    |
| CKD rate per 1000                                     | -0.0003 (-0.0020 to 0.0013)                   |
| COPD rate per 1000                                    | -0.0010 (-0.0022 to 0.0002)                   |
| CHF rate per 1000                                     | -0.0006 (-0.0022 to 0.0011)                   |
| CAD rate per 1000                                     | 0.0002 (-0.0013 to 0.0018)                    |
| Log (diabetes rate per 1000)                          | 16.2955 (5.7937-27.7623) <sup>a</sup>         |

**Supplementary Table II (online only).** Continued.

| Variable                                              | Estimated coefficient (95% credible interval) |
|-------------------------------------------------------|-----------------------------------------------|
| PAD rate per 1000                                     | 0.0265 (0.0102-0.0443) <sup>a</sup>           |
| Diabetes with PAD rate per 1000                       | 0.0292 (0.0130-0.0469) <sup>a</sup>           |
| Medicaid rate per 1000                                | 0.0002 (-0.0014 to 0.0018)                    |
| Rurality                                              | 0.1721 (-0.0660 to 0.4060)                    |
| Minor amputation zip code-level model (DIC = 1251.23) |                                               |
| Obesity rate per 1000                                 | 0.0005 (-0.0010 to 0.0019)                    |
| Hypercholesterolemia per 1000                         | -0.0002 (-0.0015 to 0.0010)                   |
| Renal failure rate per 1000                           | 0.0004 (-0.0021 to 0.0027)                    |
| CKD rate per 1000                                     | 0.0016 (0.0001-0.0032) <sup>a</sup>           |
| COPD rate per 1000                                    | -0.0005 (-0.0017 to 0.0006)                   |
| CHF rate per 1000                                     | -0.0011 (-0.0027 to 0.0005)                   |
| CAD rate per 1000                                     | -0.0007 (-0.0021 to 0.0007)                   |
| Log (diabetes rate per 1000)                          | 13.2024 (2.6292-24.9202) <sup>a</sup>         |
| PAD rate per 1000                                     | 0.0182 (0.0020-0.0360) <sup>a</sup>           |
| Diabetes with PAD rate per 1000                       | 0.0261 (0.0098-0.0439) <sup>a</sup>           |
| Medicaid rate per 1000                                | 0.0007 (-0.0008 to 0.0022)                    |
| Rurality                                              | 0.0274 (-0.2021 to 0.2531)                    |

*CAD*, Coronary artery disease; *CHF*, congestive heart failure; *CKD*, chronic kidney disease; *COPD*, chronic obstructive pulmonary disease; *DIC*, deviance information criteria; *PAD*, peripheral arterial disease.  
<sup>a</sup>Statistically significant association.
